# Supplementary material for: One pot synthesis of l -xylose from formaldehyde with an improved benzoylformate decarboxylase
Source: Royal Society of Chemistry journal article supplement (doi:10.1039/d5gc06542a), 2026-01-01
Supplement: d5gc06542a2.xlsx [file d5gc06542a2.xlsx]

## Sheet: Data of Figures
Fig. 3A
		Relative activity (%)	Error of relative activity
	M1	100	5.28824
	K188I	99.4599	1.2298
	Q192I	247.664	0.51287
	K259I	40.1579	1.88574
	K259M	72.1894	1.78693
	D327Q	56.2373	2.46532
	D327E	103.164	2.2687
	K331R	105.455	4.74606
	Q336I	126.366	3.94607
	Q336V	126.26	5.39752
Fig. 3B
		Relative activity (%)	Error of relative activity
	M1	100	9.72936
	A282P	119.521	1.03066
	G283P	4.62059	0.14657
	Q284P	75.9667	0.76783
	I286P	5.6774	0.06061
	K331P	131.949	3.88904
Fig. 3C
		Relative activity (%)	Error of relative activity	Residual activity (%)	Error of residual activity
	M1	100	1.03298	21.3119	1.32484
	K188I	99.4599	1.2298	30.7601	2.62655
	K188I/Q192I	103.304	7.43857	35.8834	8.00123
	A282P	119.521	1.03066	55.9655	6.23971
	K188I/Q192I/A282P	127.092	0.69352	65.1865	2.25329
Fig. 4A
	25 mM FALD
		PnBFD-M1		PnBFD-M2
	Time (min)	Titer of GALD production (mM)	Error of GALD production	Titer of GALD production (mM)	Error of GALD production
	0	0	0	0	0
	5	0.07007	0.00524	0.06806	0.00434
	10	0.12169	0.00744	0.13257	0.00421
	15	0.16793	0.01037	0.19256	0.00944
	20	0.20909	0.01422	0.25931	0.00781
	30	0.27038	0.01767	0.33212	0.00924
	40	0.3074	0.02111	0.40337	0.01884
	60	0.37231	0.02374	0.47971	0.03224
	90	0.4162	0.02489	0.56174	0.0336
	120	0.45109	0.03254	0.6053	0.02074
	150	0.47437	0.03708	0.65678	0.0395
Fig. 4B
	200 mM FALD
		PnBFD-M1		PnBFD-M2
	Time (min)	Titer of GALD production (mM)	Error of GALD production	Titer of GALD production (mM)	Error of GALD production
	0	0	0	0	0
	5	0.41603	0.01888	0.34288	0.00407
	10	0.67722	0.03746	0.67198	0.06928
	15	0.97283	0.01391	1.0383	0.09806
	20	1.23605	0.03957	1.4037	0.05942
	30	1.66693	0.02608	1.95281	0.11661
	40	2.03886	0.0498	2.51777	0.07422
	60	2.53108	0.00336	3.44731	0.14782
	90	3.16278	0.08889	4.0799	0.24504
	120	3.33546	0.19399	4.81858	0.27273
	150	3.68453	0.08572	5.57571	0.37064
Fig. 4C
	100 mM FALD
		PnBFD-M1		PnBFD-M2
	Time (h)	Titer of GALD production (mM)	Error of GALD production	Titer of GALD production (mM)	Error of GALD production
	0	0	0	0	0
	1	1.39153	0.09051	1.86129	0.05403
	2	1.71244	0.13655	2.5077	0.17869
	3	1.86132	0.10482	2.78172	0.021
	4.5	2.05509	0.14452	3.1582	0.20293
	6	2.317	0.12614	3.55615	0.12905
	7.5	2.47841	0.20503	3.91889	0.15961
Fig. 4D
		PnBFD-M1		PnBFD-M2
	FALD concentration (mM)	Initial rate of GALD formation (μmol/(min*g protein))	Error of initial rate	Initial rate of GALD formation (μmol/(min*g protein))	Error of initial rate
	0	0	0	0	0
	10	22.85	2.75059	24.45	1.89076
	25	51.6	3.19099	64.3	0.73989
	50	130.75	14.75	134.75	5.9
	75	174.3	15.85	191.55	12.55
	100	222.35	16.35	237.45	2.95497
	150	275.7	20.1	322.95	3.40423
	200	302.9	16	350.3	4.52159
Fig. 5A
	37 ℃
	PnBFD-M1			PnBFD-M2
	Time(min)	Residual activity (%)	Error of residual activity	Time(min)	Residual activity (%)	Error of residual activity
	0	100	1.36	0	99.9871	7.55913
	10	74.8815	3.48321	300	95.0067	2.05171
	20	63.3138	4.40525	720	84.903	4.73071
	30	55.3824	9.66342	960	74.9699	2.96511
	40	53.2807	3.16327	1200	72.7699	0.35931
	60	46.7287	3.61266	1440	63.6569	1.30053
	80	44.8993	0.73951	2520	48.6652	2.27662
	100	38.2638	0.61194	2880	41.2598	1.92081
Fig. 5B
	40 ℃
	PnBFD-M1			PnBFD-M2
	Time(min)	Residual activity (%)	Error of residual activity	Time(min)	Residual activity (%)	Error of residual activity
	0	100	1.36	0	100.041	6.48797
	5	56.3598	7.12758	15	73.2479	0
	10	46.5869	6.04288	30	65.1246	2.47478
	15	36.4442	0.51734	45	62.432	1.129
	20	32.8489	1.8003	60	50.8961	1.8046
	30	29.8193	2.04923	80	45.8341	2.75982
	40	20.192	6.66266	100	42.6047	2.90667
	60	20.1178	2.20118	120	36.039	1.0907
Fig. 5C
	45 ℃
	PnBFD-M1			PnBFD-M2
	Time(min)	Residual activity (%)	Error of residual activity	Time(min)	Residual activity (%)	Error of residual activity
	0	100	1.36	0	100.041	6.48797
	5	29.8262	2.45746	10	67.4692	4.97087
	10	16.458	2.1347	20	58.9106	1.95961
	15	16.648	2.19679	30	48.8508	0.27626
	20	11.7993	4.492	40	43.481	0.52055
	25	5.62062	0.22689	50	37.6722	0.08756
	30	5.30735	0.72207	60	35.7572	1.64149
	40	0	0	70	34.5824	0.84677
Fig. 5D
	50℃
	PnBFD-M1			PnBFD-M2
	Time(min)	Residual activity (%)	Error of residual activity	Time(min)	Residual activity (%)	Error of residual activity
	0	100	1.36	0	100.041	6.48797
	1	81.4158	1.1352	3	79.8036	2.07955
	2	46.3243	5.75232	6	49.8332	1.6063
	3	21.1912	5.44753	10	37.6065	0.52821
	4	18.1549	3.70242	15	31.4721	0.46216
	5	9.16298	1.54165	20	28.8532	1.05529
	6	7.27279	3.41179	25	24.58	2.74728
	8	6.03775	0.58346
Fig. 5E		PnBFD-M1		PnBFD-M2
	Temperature (°C)	Specific activity (U/g)	Error of specific activity	Specific activity (U/g)	Error of specific activity
	25	28.8214	0.80198	30.8727	1.5617
	30	38.3884	1.10227	44.0985	1.32889
	35	48.7765	0.70534	57.1584	0.87671
	40	55.7625	0.56342	70.6238	0.33017
	45	52.1496	1.89952	75.2293	0.44448
	50	47.7497	3.23607	86.7245	0.19697
	55	42.2104	1.4163	90.0145	1.11627
	60	31.1413	0.33055	80.956	1.58814
Fig. 5F		PnBFD-M1		PnBFD-M2
	Time for storage	Residual activity (%)	Error of residual activity	Residual activity (%)	Error of residual activity
	2 days at 4 °C	92.0787	6.94604	103.676	0.57792
	5 days at 4 °C	82.351	4.95748	99.0059	2.14633
	5 days at RT	73.18	4.1555	89.0054	1.7955
	5 days at -20 °C	103.881	2.26788	104.616	3.21044
Fig. 7A
	37°C; PnBFD-M2:FSA-TG=2:1
		L-xylose		GCA		GALD		Therose		Erythrose		FALD
	Time (h)	Titer of production (mM)	Error of titer	Titer of production (mM)	Error of titer	Titer of production (mM)	Error of titer	Titer of production (mM)	Error of titer	Titer of production (mM)	Error of titer	Titer of substrate (mM)	Error of titer
	0	0	0	0	0	0	0	0	0	0	0	100	0
	0.5	0.58344	0.019	7.39836	0.48001	1.21532	0.08837	2.60311	0.59928	0	0	54.0504	2.5655
	1	1.36078	0.03902	11.6003	0.11698	0.75889	0.02594	2.4713	0.44063	0	0	46.2442	0.87221
	2	2.79877	0.06508	14.0824	0.10725	0.40732	0.00537	1.21238	0.22113	0.2247	0.00202	37.9853	0.84883
	3	3.51686	0.06652	15.1956	0.14948	0.28594	0.01496	0	0	0.24396	0.02436	34.8307	0.68587
	5	4.46334	0.11124	15.9864	0.05335	0.2072	0.00996	0	0	0.2833	0.00504	31.3122	0.26725
	8	5.25643	0.12267	15.7422	0.69336	0.16687	0.00913	0	0	0.30654	0.07221	28.3652	0.5176
Fig. 7B
	37°C; PnBFD-M2:FSA-TG=2:2
		L-xylose		GCA		GALD		Therose		Erythrose		FALD
	Time (h)	Titer of production (mM)	Error of titer	Titer of production (mM)	Error of titer	Titer of production (mM)	Error of titer	Titer of production (mM)	Error of titer	Titer of production (mM)	Error of titer	Titer of substrate (mM)	Error of titer
	0	0	0	0	0	0	0	0	0	0	0	100	0
	0.5	0.67823	0.0162	8.4867	0.27461	0.67797	0.02235	0	0	0	0	56.9028	0.0945
	1	1.61046	0.03825	12.3247	0.56559	0.43049	0.02788	0	0	0	0	51.259	2.26688
	2	2.98027	0.0778	14.1433	0.50211	0.25119	0.01027	0	0	0.20697	0.00749	39.1307	1.15254
	3	3.72374	0.11445	15.4118	0.32556	0.21106	0.005	0	0	0.2512	0.00432	36.6835	1.57279
	5	4.85378	0.15686	15.5055	0.55439	0.16301	0.00295	0	0	0.28616	0.00908	33.235	1.53537
	8	5.71242	0.26458	14.8045	0.77146	0.15299	0.00607	0	0	0.35964	0.01787	29.757	0.52448
Fig. 7C
	37°C; PnBFD-M2:FSA-TG=4:1
		L-xylose		GCA		GALD		Therose		Erythrose		FALD
	Time (h)	Titer of production (mM)	Error of titer	Titer of production (mM)	Error of titer	Titer of production (mM)	Error of titer	Titer of production (mM)	Error of titer	Titer of production (mM)	Error of titer	Titer of substrate (mM)	Error of titer
	0	0	0	0	0	0	0	0	0	0	0	100	0
	0.5	1.15796	0.04605	10.0615	0.12932	2.19129	0.12252	8.42325	1.47563	0	0	47.2831	1.96758
	1	3.06226	0.11261	13.798	0.21734	1.27431	0.03927	9.71018	1.70818	0.23469	0.01182	33.1753	0.53078
	2	5.44744	0.11649	15.176	0.1459	0.67101	0.02622	6.23455	1.5764	0.3786	0.01585	20.9664	0.30164
	3	6.93334	0.21739	15.2416	0.2396	0.45825	0.03462	4.00917	1.34656	0.44912	0.08331	16.8402	0.32796
	5	8.56512	0.30936	14.7846	0.18812	0.27424	0.05454	2.44469	0.74424	0.57377	0.01888	12.9092	0.38754
	8	9.48731	0.35635	14.2988	0.11115	0.23114	0.00968	2.21855	0.35243	0.59099	0.03719	11.0657	0.37265
Fig. 7D
	37°C; PnBFD-M2:FSA-TG=4:2
		L-xylose		GCA		GALD		Therose		Erythrose		FALD
	Time (h)	Titer of production (mM)	Error of titer	Titer of production (mM)	Error of titer	Titer of production (mM)	Error of titer	Titer of production (mM)	Error of titer	Titer of production (mM)	Error of titer	Titer of substrate (mM)	Error of titer
	0	0	0	0	0	0	0	0	0	0	0	100	0
	0.5	1.83312	0.08042	12.6281	0.24295	0.98139	0.02491	3.53954	0.58309	0	0	41.2061	0.92782
	1	3.97262	0.07578	15.1093	0.41571	0.48427	0.03349	1.88416	0.07483	0.28524	0.0049	28.3816	0.88096
	2	6.37695	0.29537	15.5221	0.21064	0.24375	0.03251	0	0	0.39276	0.02436	18.8061	0.72903
	3	7.70618	0.45567	15.2841	0.23642	0.20597	0.00406	0	0	0.4904	0.01023	15.9448	0.69128
	5	9.21981	0.55717	14.1826	0.39852	0.17514	0.00307	0	0	0.59538	0.00332	13.4422	1.27218
	8	10.3959	0.65258	12.6501	1.23475	0.16697	0.00293	0	0	0.63574	0.01831	11.6656	1.0791
Fig. 8A
	37°C; PnBFD-M2:FSA-TG=8:4
		L-xylose		GCA		GALD		Therose		Erythrose		FALD
	Time (h)	Titer of production (mM)	Error of titer	Titer of production (mM)	Error of titer	Titer of production (mM)	Error of titer	Titer of production (mM)	Error of titer	Titer of production (mM)	Error of titer	Titer of substrate (mM)	Error of titer
	0	0	0	0	0	0	0	0	0	0	0	100	0
	2	12.2856	0.21113	10.1088	0.40948	0.17354	0.00551	0.99349	0.21238	0.7896	0.14313	4.45048	0.39225
	4	14.3214	0.14204	7.71179	0.16786	0.18223	0.01458	1.10555	0.05366	0.9564	0.04382	1.76206	0.13766
	6	15.0006	0.15351	6.90682	0.16797	0.17322	0.00229	1.23798	0.14941	1.13286	0.03758	1.10882	0.14762
	8	15.1555	0.06523	6.33066	0.17592	0.16279	0.01055	1.37604	0.1104	1.1154	0.06927	0.7933	0.09936
	10	15.1684	0.12243	6.13075	0.49082	0.17191	0.00262	1.73017	0.09862	1.17227	0.05736	0.97664	0.20827
Fig. 8B
	40°C; PnBFD-M2:FSA-TG=8:4
		L-xylose		GCA		GALD		Therose		Erythrose		FALD
	Time (h)	Titer of production (mM)	Error of titer	Titer of production (mM)	Error of titer	Titer of production (mM)	Error of titer	Titer of production (mM)	Error of titer	Titer of production (mM)	Error of titer	Titer of substrate (mM)	Error of titer
	0	0	0	0	0	0	0	0	0	0	0	100	0
	2	12.8325	0.88954	11.9486	1.00951	0.19127	0.02009	1.4879	0.38741	1.16078	0.10151	4.24754	0.69891
	4	14.0082	1.3162	9.6058	1.12999	0.18784	0.00936	1.78238	0.42811	1.19401	0.03747	2.14342	0.72518
	6	14.3245	1.05853	7.18187	0.02473	0.17222	0.000476708	1.83539	0.4312	1.28682	0.12805	2.40634	0.00369
	8	14.8898	1.10727	7.70753	1.13352	0.16464	0.02061	1.85111	0.42383	1.45478	0.09004	1.52149	0.48906
	10	15.6973	1.16438	6.80247	1.04629	0.15842	0.00323	0.87034	0.11854	1.38405	0.04694	1.46761	0.35891
Fig. 8C
	50°C; PnBFD-M2:FSA-TG=8:4
		L-xylose		GCA		GALD		Therose		Erythrose		FALD
	Time (h)	Titer of production (mM)	Error of titer	Titer of production (mM)	Error of titer	Titer of production (mM)	Error of titer	Titer of production (mM)	Error of titer	Titer of production (mM)	Error of titer	Titer of substrate (mM)	Error of titer
	0	0	0	0	0	0	0	0	0	0	0	100	0
	2	12.2083	0.3961	8.45326	0.03998	0.23978	0.01177	2.94475	0.33691	1.05132	0.14818	2.82226	0.49238
	4	12.6549	0.17593	6.26693	0.24732	0.1964	0.00394	2.99232	0.29343	1.19258	0.05021	2.35054	0.58564
	6	12.9388	0.22528	4.81025	0.29367	0.17492	0.00151	3.19952	0.26399	1.27921	0.05106	2.24593	0.62711
	8	13.1995	0.14132	3.74975	0.28633	0.16676	0.00216	3.35008	0.26034	1.30544	0.09669	2.17521	0.69304
	10	13.6028	0.29811	3.35582	0.18557	0.15528	0.00725	3.5081	0.29768	1.33106	0.03917	1.98403	0.47841
Fig. 8D
	40°C; PnBFD-M1:FSA-TG=8:4
		L-xylose		GCA		GALD		Therose		Erythrose		FALD
	Time (h)	Titer of production (mM)	Error of titer	Titer of production (mM)	Error of titer	Titer of production (mM)	Error of titer	Titer of production (mM)	Error of titer	Titer of production (mM)	Error of titer	Titer of substrate (mM)	Error of titer
	0	0	0	0	0	0	0	0	0	0	0	100	0
	2	9.13774	0.14931	11.1729	0.1912	0.17548	0.00289	0.66979	0.11778	1.07911	0.10393	9.97674	0.35541
	4	10.8475	0.21826	8.53776	0.20966	0.16104	0.000917917	0.76069	0.08448	1.10378	0.02269	6.56435	0.5608
	6	11.3394	0.25408	7.21045	0.14805	0.15411	0.00204	0.91387	0.0564	1.03216	0.07638	5.68937	0.57247
	8	11.4534	0.26479	6.13473	0.08609	0.1505	0.00252	0.95963	0.10227	1.02109	0.0522	5.00743	0.43778
	10	11.405	0.24239	5.21158	0.09826	0.15149	0.0083	0.99974	0.04121	1.01681	0.01257	4.71936	0.39769
Fig. 8E
	50°C; PnBFD-M1:FSA-TG=8:4
		L-xylose		GCA		GALD		Therose		Erythrose		FALD
	Time (h)	Titer of production (mM)	Error of titer	Titer of production (mM)	Error of titer	Titer of production (mM)	Error of titer	Titer of production (mM)	Error of titer	Titer of production (mM)	Error of titer	Titer of substrate (mM)	Error of titer
	0	0	0	0	0	0	0	0	0	0	0	100	0
	2	8.18499	0.28025	11.3944	0.39613	0.16522	0.00399	3.81326	0.06501	0.75712	0.04875	14.3479	0.74236
	4	8.70995	0.26582	8.42817	0.04824	0.13148	0.00442	4.15651	0.05863	0.83533	0.04241	12.4504	0.75831
	6	9.14817	0.05017	6.62137	0.02357	0.12611	0.000373347	4.31594	0.07229	0.86814	0.04815	12.32	0.46783
	8	9.04972	0.14052	5.32453	0.06422	0.13104	0.00322	4.38245	0.07349	0.87134	0.03512	11.695	0.61513
	10	9.48548	0.21433	4.77981	0.0665	0.12967	0.00403	4.55075	0.15058	0.94404	0.09971	11.0702	0.87754
Fig. S5A
	10 mM FALD
		PnBFD-M1		PnBFD-M2
	Time (min)	Titer of GALD production (mM)	Error of GALD production	Titer of GALD production (mM)	Error of GALD production
	0	0	0	0	0
	5	0.04163	0.00134	0.03758	0.00181
	10	0.06073	0.00209	0.05903	0.00108
	15	0.07733	0.00336	0.07826	0.00116
	20	0.09648	0.00344	0.10198	0.00257
	30	0.11502	0.0015	0.12851	0.00336
	40	0.13439	0.00411	0.15093	0.000962046
	60	0.15	0.00447	0.17748	0.00626
	90	0.16295	0.00652	0.2036	0.00477
	120	0.17626	0.00423	0.21742	0.00556
	150	0.19116	0.00511	0.23904	0.00272
Fig. S5B
	50 mM FALD
		PnBFD-M1		PnBFD-M2
	Time (min)	Titer of GALD production (mM)	Error of GALD production	Titer of GALD production (mM)	Error of GALD production
	0	0	0	0	0
	5	0.22891	0.000766395	0.17398	0.00505
	10	0.34215	0.00887	0.29594	0.0069
	15	0.44514	0.01587	0.43116	0.00729
	20	0.54552	0.00301	0.54526	0.01318
	30	0.66597	0.01123	0.72672	0.01441
	40	0.78641	0.01023	0.87436	0.03965
	60	0.93155	0.00319	1.06084	0.04283
	90	1.03955	0.04176	1.18257	0.02449
	120	1.12336	0.03633	1.3656	0.02203
	150	1.18867	0.02354	1.48028	0.08556
Fig. S5C
	75 mM FALD
		PnBFD-M1		PnBFD-M2
	Time (min)	Titer of GALD production (mM)	Error of GALD production	Titer of GALD production (mM)	Error of GALD production
	0	0	0	0	0
	5	0.28096	0.01338	0.22673	0.02255
	10	0.43469	0.00643	0.42422	0.04403
	15	0.57828	0.01303	0.64392	0.02427
	20	0.72287	0.01126	0.74915	0.02572
	30	0.91378	0.02492	1.01724	0.02593
	40	1.06724	0.01555	1.27374	0.03436
	60	1.28608	0.03859	1.66396	0.04108
	90	1.41578	0.05004	1.80227	0.06864
	120	1.57258	0.01911	2.05073	0.03003
	150	1.6762	0.00922	2.33813	0.1556
Fig. S5D
	100 mM FALD
		PnBFD-M1		PnBFD-M2
	Time (min)	Titer of GALD production (mM)	Error of GALD production	Titer of GALD production (mM)	Error of GALD production
	0	0	0	0	0
	5	0.33984	0.01471	0.24977	0.02535
	10	0.52413	0.02351	0.47044	0.01154
	15	0.71896	0.04466	0.70662	0.02681
	20	0.92211	0.03367	0.95888	0.03505
	30	1.18851	0.0394	1.30461	0.01382
	40	1.3828	0.05992	1.57093	0.04992
	60	1.80887	0.0605	2.02403	0.06708
	90	2.07562	0.04127	2.45078	0.04184
	120	2.24308	0.07507	2.69681	0.02413
	150	2.42114	0.08991	3.05075	0.13879
Fig. S5E
	150 mM FALD
		PnBFD-M1		PnBFD-M2
	Time (min)	Titer of GALD production (mM)	Error of GALD production	Titer of GALD production (mM)	Error of GALD production
	0	0	0	0	0
	5	0.41691	0.02161	0.30644	0.01387
	10	0.65006	0.02023	0.62488	0.02576
	15	0.9012	0.03584	0.9679	0.03636
	20	1.13633	0.01963	1.28395	0.01915
	30	1.47229	0.01454	1.77062	0.07648
	40	1.80281	0.05806	2.33964	0.07351
	60	2.28427	0.04751	3.02969	0.21571
	90	2.62322	0.0104	3.62299	0.10286
	120	2.86013	0.10748	4.28262	0.38678
	150	3.14851	0.05039	4.85475	0.2201
Fig. S5F
	37℃
	GALS-YM
	Time(min)	Residual activity (%)	Error of residual activity
	0	98.3827	6.15339
	120	26.7375	1.12757
	240	22.2776	0.50255
	300	19.3602	0.60736
Fig. S6		PnBFD-M1		PnBFD-M1
	Batch	Residual activity (%)	Error of residual activity	Residual activity (%)	Error of residual activity
	1	100.016	1.39542	99.9942	3.11425
	2	47.0819	1.95523	61.3649	1.51479
	3	27.9791	1.3239	36.8517	0.750158
	4	0	0	29.0981	0.269317
Fig. S8
	Substrate	Titer of xylose concentration (mM)	Error of titer
	FALD + threose	0.40359	0.01484
	FALD+ erythrose	0	0
Fig. S9A
	37°C; PnBFD-M2:FSA-TG=6:3
		L-xylose		GCA		GALD		Therose		Erythrose		FALD
	Time (h)	Titer of production (mM)	Error of titer	Titer of production (mM)	Error of titer	Titer of production (mM)	Error of titer	Titer of production (mM)	Error of titer	Titer of production (mM)	Error of titer	Titer of substrate (mM)	Error of titer
	0	0	0	0	0	0	0	0	0	0	0	100	0
	2	8.88558	0.11391	14.3616	0.57008	0.18724	0.00507	0.99349	0.21238	0.68503	0.03173	12.4817	0.56349
	4	11.2455	0.09208	12.0313	0.11311	0.16632	0.0089	1.10555	0.05366	0.8536	0.03494	8.99484	0.04342
	6	12.3629	0.11167	11.3964	0.38763	0.15895	0.0025	1.23798	0.14941	0.95144	0.03949	8.29319	0.34879
	8	13.0162	0.21783	10.267	0.26936	0.15888	0.00623	1.37604	0.1104	0.96537	0.04012	7.37039	0.21005
	10	13.9584	0.28477	9.91759	0.05476	0.15236	0.00551	1.73017	0.09862	0.98284	0.09903	7.19241	0.04885
Fig. S9B
	37°C; PnBFD-M2:FSA-TG=6:4
		L-xylose		GCA		GALD		Therose		Erythrose		FALD
	Time (h)	Titer of production (mM)	Error of titer	Titer of production (mM)	Error of titer	Titer of production (mM)	Error of titer	Titer of production (mM)	Error of titer	Titer of production (mM)	Error of titer	Titer of substrate (mM)	Error of titer
	0	0	0	0	0	0	0	0	0	0	0	100	0
	2	8.87967	0.0891	14.1979	0.17656	0.17257	0.00128	0	0	0.57054	0.05058	13.6528	0.55469
	4	11.6566	0.03187	11.0826	0.11427	0.15728	0.00448	0.76694	0.0604	0.84939	0.02921	10.2425	0.20582
	6	12.5013	0.27591	9.8832	0.07979	0.15174	0.00689	1.10817	0.05234	0.89247	0.04359	9.21999	0.17914
	8	13.6052	0.40249	8.69447	0.17146	0.14125	0.01439	1.01868	0.0014	0.99955	0.0314	8.14074	0.46603
	10	14.1232	0.41635	7.76886	0.08476	0.14216	0.00495	1.08036	0.08034	1.00832	0.04766	7.47728	0.10925
Fig. S9C
	37°C; PnBFD-M2:FSA-TG=10:4
		L-xylose		GCA		GALD		Therose		Erythrose		FALD
	Time (h)	Titer of production (mM)	Error of titer	Titer of production (mM)	Error of titer	Titer of production (mM)	Error of titer	Titer of production (mM)	Error of titer	Titer of production (mM)	Error of titer	Titer of substrate (mM)	Error of titer
	0	0	0	0	0	0	0	0	0	0	0	100	0
	2	13.642	0.11543	9.87093	0.14386	0.16423	0.00512	0.97797	0.01363	0.77139	0.03989	2.88163	0.04505
	4	12.8908	0.06878	7.90464	0.17219	0.19267	0.00317	1.73904	0.04663	0.94968	0.07097	0.78036	0.02495
	6	12.8623	0.11434	7.04886	0.05191	0.17075	0.00303	1.96378	0.01374	1.01973	0.08858	0.88781	0.0161
	8	14.7898	0.03885	6.33802	0.26507	0.16935	0.00502	1.681	0.02026	1.17288	0.03447	0.69162	0.06285
	10	14.4455	0.29012	6.159	0.08669	0.16622	0.01523	1.91037	0.04507	1.07585	0.1051	0.55496	0.02893
Fig. S9D
	45°C; PnBFD-M2:FSA-TG=8:4
		L-xylose		GCA		GALD		Therose		Erythrose		FALD
	Time (h)	Titer of production (mM)	Error of titer	Titer of production (mM)	Error of titer	Titer of production (mM)	Error of titer	Titer of production (mM)	Error of titer	Titer of production (mM)	Error of titer	Titer of substrate (mM)	Error of titer
	0	0	0	0	0	0	0	0	0	0	0	100	0
	2	13.2655	0.65123	9.29868	0.71916	0.22026	0.00484	1.16622	0.23708	1.00689	0.06333	2.58508	0.33626
	4	14.111	0.12128	7.19826	0.10204	0.19587	0.00975	1.43731	0.092	0.99377	0.0776	2.21391	0.73282
	6	14.2152	0.18111	6.09698	0.06144	0.17497	0.00246	1.84869	0.89004	1.23362	0.13745	1.48282	0.49748
	8	13.7496	0.18537	5.18001	0.06352	0.1558	0.000367346	2.84397	0.29328	1.13232	0.02313	1.42402	0.34167
	10	14.1426	0.12127	4.7477	0.05685	0.14409	0.0086	2.89557	0.28209	1.25183	0.04811	1.40708	0.28189
Fig. S9E
	37°C; PnBFD-M1:FSA-TG=8:4
		L-xylose		GCA		GALD		Therose		Erythrose		FALD
	Time (h)	Titer of production (mM)	Error of titer	Titer of production (mM)	Error of titer	Titer of production (mM)	Error of titer	Titer of production (mM)	Error of titer	Titer of production (mM)	Error of titer	Titer of substrate (mM)	Error of titer
	0	0	0	0	0	0	0	0	0	0	0	100	0
	2	8.67064	0.25665	11.8365	0.13867	0.17484	0.00361	0.40736	0.03943	1.51261	0.20486	11.3897	0.64316
	4	10.7812	0.43771	8.98152	0.26547	0.15294	0.0115	0.64379	0.04749	1.55473	0.46261	7.01633	0.95515
	6	11.6896	0.46572	7.54117	0.11581	0.1558	0.00186	0.62222	0.07331	1.37936	0.42157	5.83459	0.72523
	8	11.6077	0.38131	6.46961	0.06918	0.14995	0.00348	0.64621	0.06093	1.54617	0.10343	4.9956	0.62305
	10	11.7593	0.27506	5.63741	0.12183	0.14812	0.00126	0.64963	0.15625	1.40634	0.09927	4.4845	0.65872
Fig. S9F
	45°C; PnBFD-M1:FSA-TG=8:4
		L-xylose		GCA		GALD		Therose		Erythrose		FALD
	Time (h)	Titer of production (mM)	Error of titer	Titer of production (mM)	Error of titer	Titer of production (mM)	Error of titer	Titer of production (mM)	Error of titer	Titer of production (mM)	Error of titer	Titer of substrate (mM)	Error of titer
	0	0	0	0	0	0	0	0	0	0	0	100	0
	2	8.67345	2.14594	11.0867	0.66657	0.195	0.00163	1.68916	0.03463	0.61698	0.04742	9.23343	0.58369
	4	8.86828	2.41784	8.54796	0.21606	0.16293	0.00917	1.56429	0.73359	0.80149	0.10566	7.0219	0.18095
	6	10.2251	1.93583	7.1584	0.17126	0.15037	0.00712	2.02687	0.48177	0.79014	0.06299	6.50018	0.45719
	8	10.8467	1.20623	5.78299	0.20025	0.14868	0.00215	2.17985	0.28043	0.85591	0.12368	5.98536	0.53298
	10	11.4849	0.10934	5.19153	0.23044	0.14558	0.000142093	2.86393	0.57898	0.95729	0.07639	5.78942	0.49036
